# Supplementary material for: Fabrication of amorphous Co/Mo–MnSex electrode materials for high-performance hybrid supercapacitors
Source: Royal Society of Chemistry journal article supplement (doi:10.1039/d3nj03859a), 2023-01-01
Supplement: d3nj03859a1.pdf [file d3nj03859a1.pdf]

# Fabrication of amorphous Co/Mo–MnSe<sub>x</sub> electrode materials for high-performance hybrid supercapacitors

*Qian Zhang*<sup>a</sup>, *Guoxiang Wang*<sup>a, \*</sup>, *Taipu Chen*<sup>b, c</sup>, *Hao Wu*<sup>a</sup>, *Rui Yuan*<sup>a</sup>, *Boyan Ai*<sup>a</sup>,

*Pengchao Liang*<sup>a</sup>, *Dahui Fang*<sup>b</sup>, *Qingwang Min*<sup>a, \*</sup>

<sup>a</sup> School of Light Industry & Chemical Engineering, Dalian Polytechnic University,  
Dalian 116034, China.

<sup>b</sup> Dalian Institute of Chemical Physics, Chinese Academy of Sciences, Dalian 116023,  
China

<sup>c</sup> University of Chinese Academy of Sciences, Beijing 100039, China

---

## Author Contributions

\*Corresponding author.

E-mail address: wanggx1000@126.com (G.X. Wang)

E-mail address: minqw@dlpu.edu.c

The specific capacitance ( $C$ , F  $g^{-1}$ ) is calculated from the GCD curve according to Equation (1).

$$C = \frac{I \times \Delta t}{m \times \Delta v} \quad (1)$$

Specific capacitances derived from GCD curves in the two electrode ( $C$ , F  $g^{-1}$ ) system were counted by formula (2):

$$C = \frac{2i_m \int V dt}{V_1^2 - V_0^2} \quad (2)$$

The energy density ( $E$ , Wh  $kg^{-1}$ ) and power density ( $P$ , W  $kg^{-1}$ ) in the two electrodes were calculated using the following two formulas.

$$E = \frac{1/2C(\Delta V)^2}{3.6} \quad (3)$$

$$P = \frac{E \times 3600}{\Delta t} \quad (4)$$

Where  $t$  denotes the discharge time (s),  $m$  is the quality of active material (g),  $I$  is the discharge current (A),  $V$  is the potential change during the discharge process (V) and  $i_m$  is the current density (A  $g^{-1}$ ).

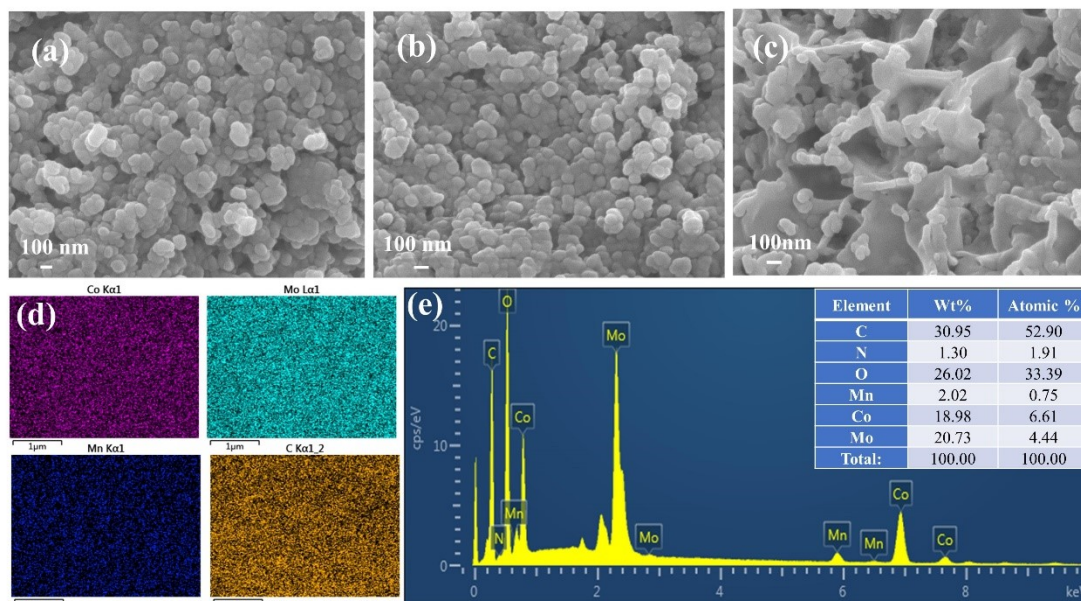

**Fig. S 1.** SEM images of (a) Co/Mo-MOF, (b) Co/Mo-MOF-Mn, (c) Co/MoSe<sub>x</sub>, (d) Elemental mapping and (e) EDS image of Co/Mo-MOF-Mn.

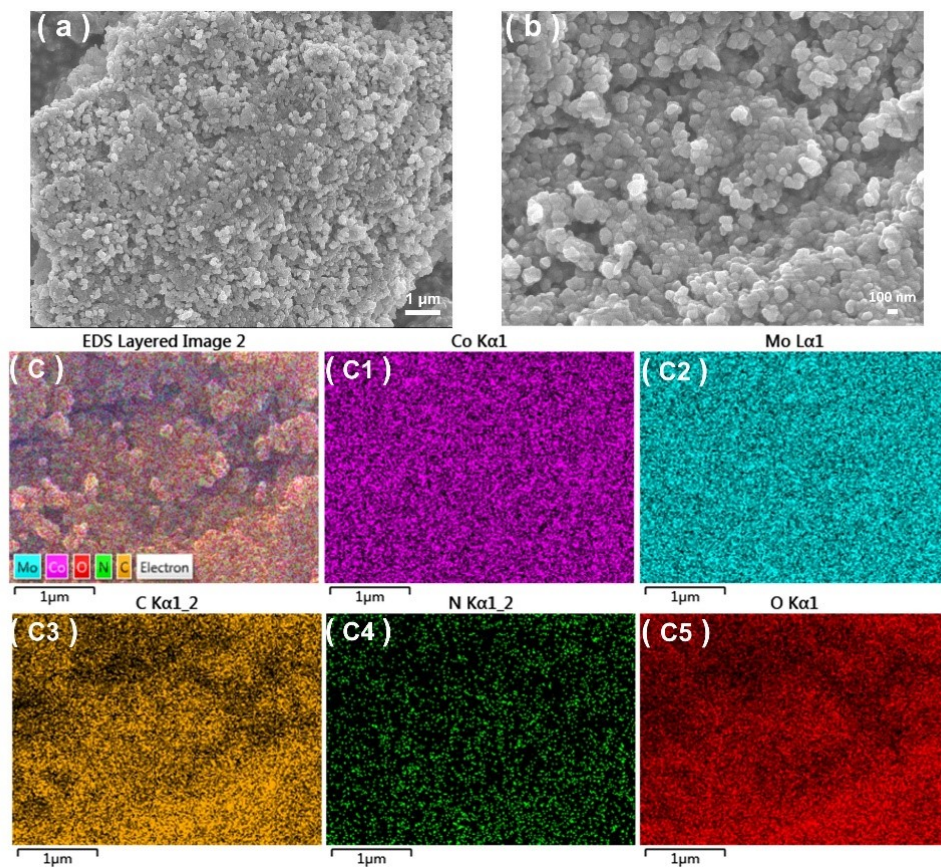

**Fig. S 2.** (a, b) SEM images and (c) EDS mapping distribution of Co/Mo-MOF.

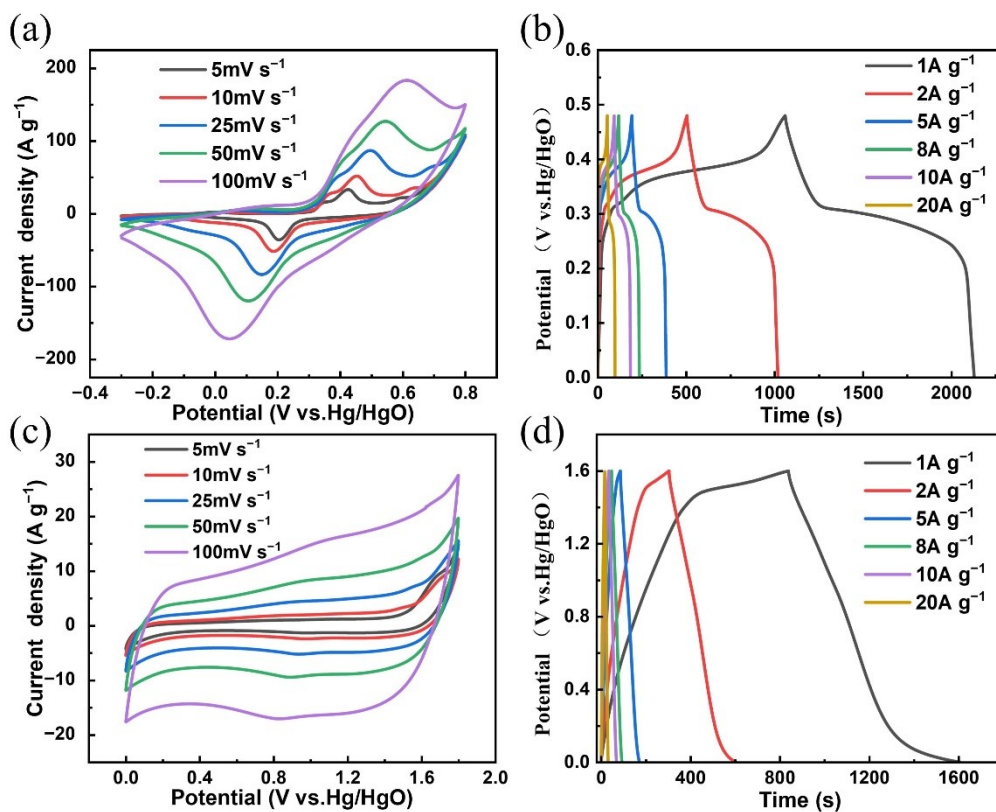

**Fig. S 3.** (a, c) CV curves at various scan rates and (b, d) GCD curves at various densities of Co/Mo-MOF and Co/Mo-MOF//AC.

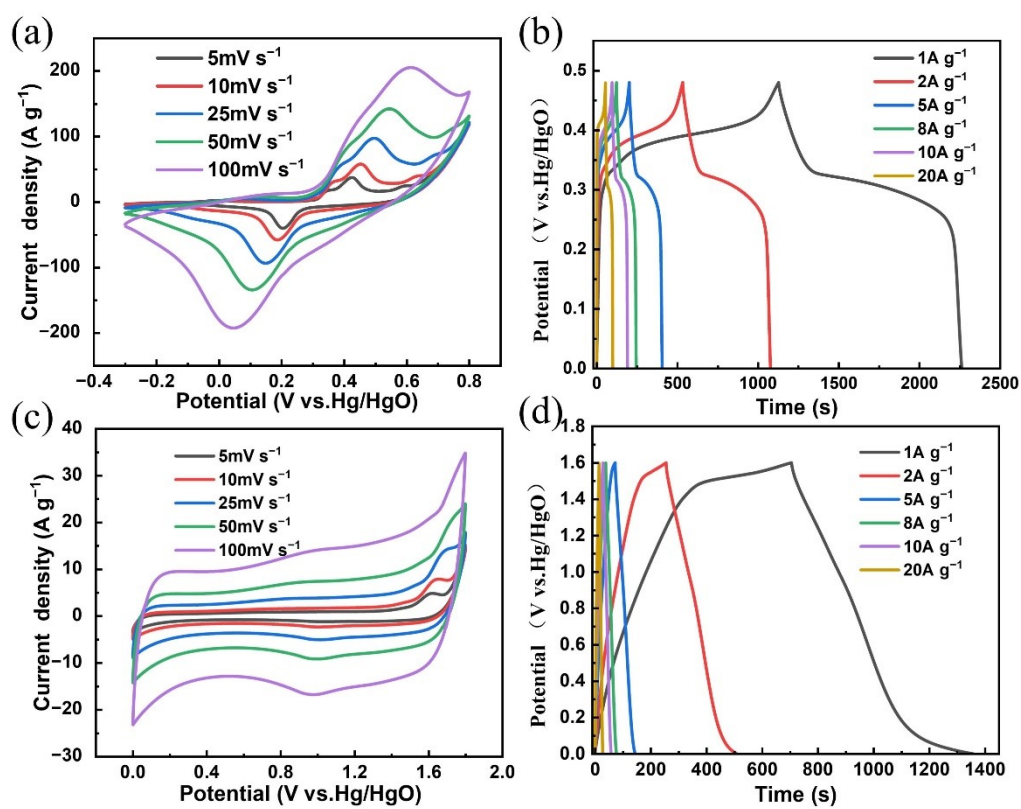

**Fig. S 4.** (a, c) CV curves at various scan rates and (b, d) GCD curves at various densities of Co/Mo-Mn and Co/Mo-Mn//AC.

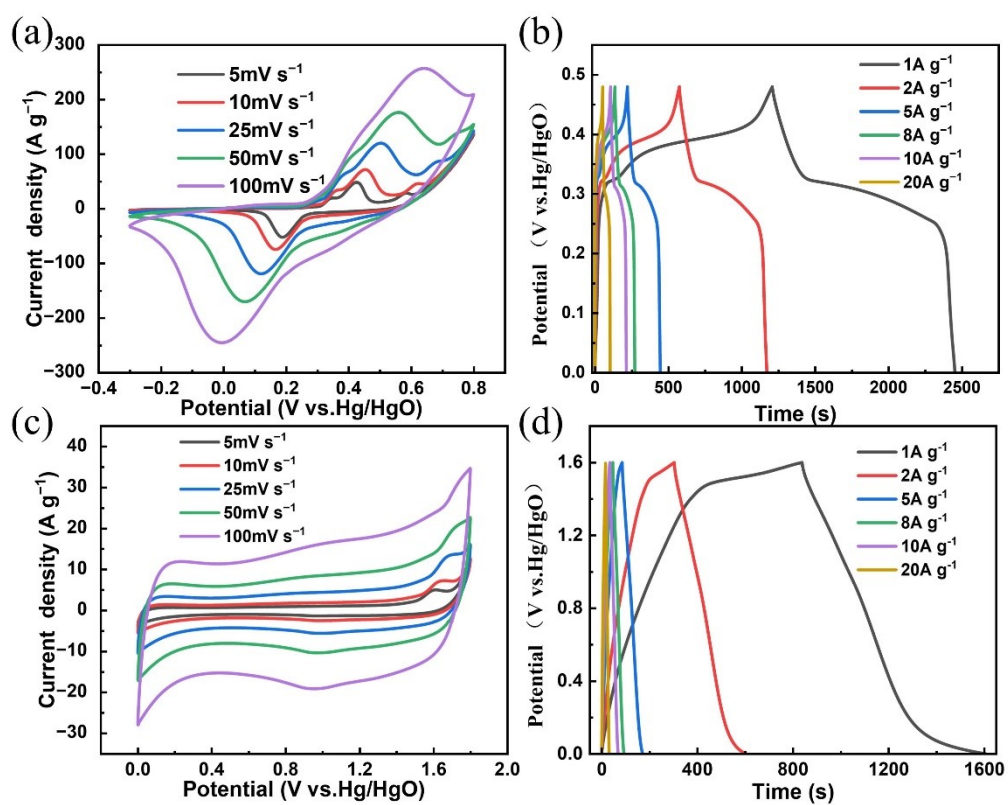

**Fig. S 5.** (a, c) CV curves at various scan rates and (b, d) GCD curves at various densities of Co/MoSe<sub>x</sub> and Co/MoSe<sub>x</sub>//AC.

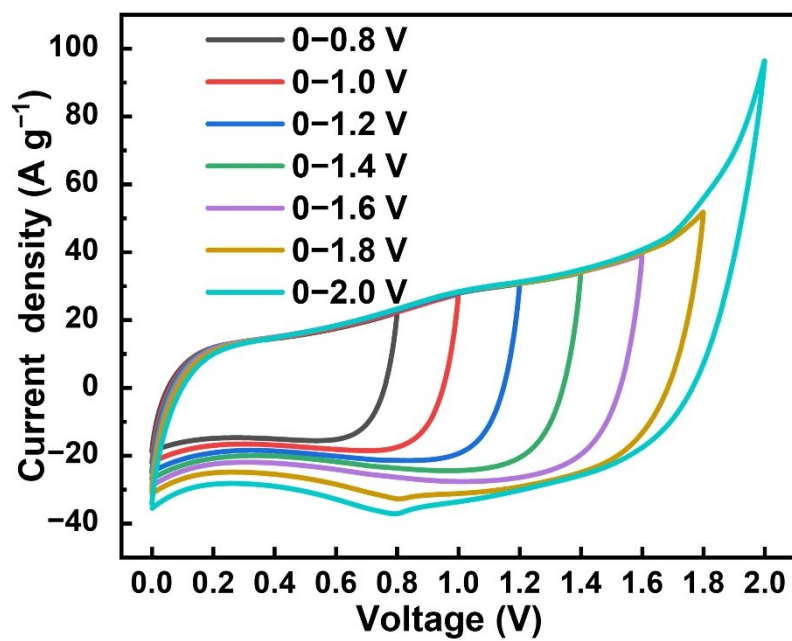

**Fig. S 6** CV curves of CO/Mo-MnSe<sub>x</sub>//AC at different potential ranging from 0.8 to 2.0 V at 100 mV·s<sup>-1</sup>.



**Table. S 1** Results of EIS fitting for four samples.

| Sample                  | $R_s/\Omega$ | $R_{ct}/\Omega$ |
|-------------------------|--------------|-----------------|
| CO/Mo-MOF               | 0.67         | 3.14            |
| CO/Mo-MOF-Mn            | 0.67         | 4.05            |
| CO/MoSex                | 0.62         | 6.32            |
| CO/Mo-MnSe <sub>x</sub> | 0.59         | 1.88            |

**Table. S 2** Energy density of Co/Mo–MnSe<sub>x</sub>//AC compared with other reported high-performance HBS.

| Devices                                   | Power density (W kg <sup>-1</sup> ) | Energy density (Wh kg <sup>-1</sup> ) | Reference |
|-------------------------------------------|-------------------------------------|---------------------------------------|-----------|
| Co–Mo–Se//AC                              | 1094.0                              | 44.7                                  | 1         |
| CoSe <sub>2</sub> //AC                    | 387.0                               | 18.9                                  | 2         |
| MnSe <sub>2</sub> @MoSe <sub>2</sub> //AC | 747.0                               | 75.0                                  | 3         |
| CuSe <sub>2</sub> @MoSe <sub>2</sub> //AC | 746.0                               | 113.0                                 | 4         |
| MCS <sub>2</sub> -3h/rGO//AC              | 853.1                               | 45.8                                  | 5         |
| NMSe/rGO-140//AC                          | 800.7                               | 51.4                                  | 6         |
| MNSe@NF//AC@NF                            | 858.4                               | 66.0                                  | 7         |
| This work                                 | 496.0                               | 141.3                                 | This work |

## References

1. C. Miao, C. Zhou, H.-E. Wang, K. Zhu, K. Ye, Q. Wang, J. Yan, D. Cao, N. Li and G. Wang, *Journal of Power Sources*, 2021, **490**, 229532.
2. S. Liu, S. Sarwar, J. Wang, H. Zhang, T. Li, J. Luo and X. Zhang, *Journal of Materials Chemistry C*, 2021, **9**, 228-237.
3. M. S. Vidhya, R. Yuvakkumar, P. S. Kumar, G. Ravi and D. Velauthapillai, *Topics in Catalysis*, 2021, **65**, 615-622.
4. M. S. Vidhya, R. Yuvakkumar, P. S. Kumar, G. Ravi, D. Velauthapillai and P. N. Asrami, *Topics in Catalysis*, 2022, **65**, 668-676.
5. H. Xuan, G. Zhang, X. Han, R. Wang, X. Liang, Y. Li and P. Han, *Journal of Alloys and Compounds*, 2021, **863**, 158751.
6. G. Zhang, H. Xuan, J. Yang, R. Wang, Z. Xie, X. Liang, P. Han and Y. Wu, *Journal of Power Sources*, 2021, **506**, 230255.
7. B. Ameri, A. Mohammadi Zardkhoshoui and S. S. Hosseiny Davarani, *Dalton Trans*, 2021, **50**, 8372-8384.
